# Supplementary material
Source: PubMed Central journal article supplement (PMC8294042)
Supplement: NIHMS1720250-supplement-Supplementary_Material.pdf [file NIHMS1720250-supplement-Supplementary_Material.pdf]

Strohmaier et al.

Supplemental Table 1. Percent differences and 95% confidence intervals of diurnal cortisol components comparing GUTS 2 participants born to mothers who never worked night shifts before pregnancy to those whose mothers had worked night shifts before pregnancy, stratified by chronotype.

|                                           | Maternal history of night shift work before pregnancy |            |                   |              |                    |               |                    |
|-------------------------------------------|-------------------------------------------------------|------------|-------------------|--------------|--------------------|---------------|--------------------|
|                                           | Never                                                 | Ever       |                   | Ever         |                    | Ever          |                    |
|                                           |                                                       | Unadjusted |                   | MV model 1 * |                    | MV model 2 ** |                    |
|                                           |                                                       | %D         | 95% CI            | %D           | 95% CI             | %D            | 95% CI             |
| <b>Definite morning types (n=118)</b>     | N=34                                                  | N=84       |                   | N=84         |                    | N=84          |                    |
| Awakening level <sup>a</sup>              | 0 (ref.)                                              | -2.9       | (-23.5, 23.3)     | -2.4         | (-23.3, 24.1)      | -0.2          | (-22.0, 27.6)      |
| Awakening response <sup>b</sup>           | 0 (ref.)                                              | 1.4        | (-35.5, 59.7)     | -1.6         | (-37.2, 55.4)      | -4.1          | (-38.8, 50.5)      |
| Early decline <sup>c</sup>                | 0 (ref.)                                              | -0.1       | (-9.4, 10.3)      | 0.6          | (-8.9, 11.1)       | 0.9           | (-8.5, 11.3)       |
| Late decline <sup>d</sup>                 | 0 (ref.)                                              | 2.7        | (-0.7, 6.2)       | 2.6          | (-0.8, 6.2)        | 2.6           | (-0.9, 6.1)        |
| Night rise <sup>e</sup>                   | 0 (ref.)                                              | 30.7       | (-35.4, 164.4)    | 32.2         | (-34.6, 167.4)     | 35.4          | (-34.0, 177.5)     |
| AUC <sup>f</sup>                          | 0 (ref.)                                              | 1.6        | (-0.8, 3.9)       | 1.6          | (-0.8, 3.9)        | 1.7           | (-1.0, 4.4)        |
| Overall slope <sup>g</sup>                | 0 (ref.)                                              | <b>2.4</b> | <b>(0.0, 4.8)</b> | <b>2.4</b>   | <b>(0.0, 4.8)</b>  | <b>2.4</b>    | <b>(0.0, 4.8)</b>  |
| Overall slope without peak <sup>h</sup>   | 0 (ref.)                                              | 2.4        | (-0.3, 5.2)       | 2.4          | (-0.3, 5.1)        | 2.3           | (-0.4, 5.1)        |
| <b>Not definite morning types (n=225)</b> | N=82                                                  | N=143      |                   | N=143        |                    | N=143         |                    |
| Awakening level <sup>a</sup>              | 0 (ref.)                                              | 13.4       | (-2.5, 31.9)      | <b>17.3</b>  | <b>(0.9, 36.3)</b> | <b>16.7</b>   | <b>(0.4, 35.8)</b> |
| Awakening response <sup>b</sup>           | 0 (ref.)                                              | -5.1       | (-28.3, 25.7)     | -5.0         | (-28.3, 26.0)      | -4.9          | (-28.3, 26.2)      |
| Early decline <sup>c</sup>                | 0 (ref.)                                              | -3.7       | (-9.3, 2.3)       | -3.5         | (-9.1, 2.5)        | -3.6          | (-9.2, 2.4)        |
| Late decline <sup>d</sup>                 | 0 (ref.)                                              | 1.5        | (-0.5, 3.5)       | 1.5          | (-0.6, 3.5)        | 1.5           | (-0.5, 3.5)        |
| Night rise <sup>e</sup>                   | 0 (ref.)                                              | 7.5        | (-19.8, 44.2)     | 5.9          | (-21.0, 42.0)      | 4.8           | (-21.7, 40.4)      |
| AUC <sup>f</sup>                          | 0 (ref.)                                              | 0.8        | (-0.7, 2.3)       | 1.4          | (-0.1, 2.9)        | 1.4           | (-0.1, 2.8)        |
| Overall slope <sup>g</sup>                | 0 (ref.)                                              | 0.2        | (-1.0, 1.5)       | 0.2          | (-1.1, 1.4)        | 0.2           | (-1.1, 1.4)        |
| Overall slope without peak <sup>h</sup>   | 0 (ref.)                                              | 0.4        | (-1.0, 1.7)       | 0.4          | (-1.0, 1.8)        | 0.3           | (-1.0, 1.7)        |

Abbreviations: %D, Percent Differences; CI, confidence interval; AUC, area under curve;

<sup>a</sup> Cortisol level at awakening

<sup>b</sup> Change from awakening to 45 minutes after awakening

<sup>c</sup> Change from 45 minutes after awakening to 4 hours after awakening

<sup>d</sup> Change from 4 hours after awakening to 16 hours after awakening

<sup>e</sup> Change from 16 hours after awakening to bedtime

<sup>f</sup> Area under the curve, levels from wake up time to 16 hours after awakening

<sup>g</sup> Change from wakening to bedtime

<sup>h</sup> Change from wakening to bedtime without morning peak (at 45 minutes)

\* Adjusted for age at sample collection, wake-up sample within 15 min of waking up (yes/no), saliva collection characteristics (brushed, ate, drank, exercised, happy, worried), usual hours of sleep, last night's hours of sleep, trauma score in last month (0,1, 2+ events), belonging to sexual orientation minority (yes/no); birth control (yes/no, in females only)

\*\* Additionally adjusted for maternal characteristics: maternal age at birth, BMI before pregnancy, smoking status before pregnancy (smoker, past smoker, never smoker), alternative healthy eating score (quintiles), physical activity (MET-hours/week; quintiles), husband's education (less than 2yr college, 4yr college, grad school), maternal lifetime history of depression diagnosis (yes/no)

Supplemental Table 2. Percent differences and 95% confidence intervals of alpha amylase components comparing GUTS 2 participants born to mothers who never worked night shifts before pregnancy to those whose mothers had worked night shifts before pregnancy, stratified by chronotype.

|                                           | Maternal history of night shift work before pregnancy |              |                       |              |                       |              |                       |
|-------------------------------------------|-------------------------------------------------------|--------------|-----------------------|--------------|-----------------------|--------------|-----------------------|
|                                           | Never                                                 | Ever         |                       | Ever         |                       | Ever         |                       |
|                                           |                                                       | Unadjusted   | MV model 1 *          |              | MV model 2 **         |              |                       |
|                                           |                                                       | %D           | 95% CI                | %D           | 95% CI                | %D           | 95% CI                |
| <b>Definite morning types (n=118)</b>     | N=31                                                  | N=71         |                       | N=71         |                       | N=71         |                       |
| Awakening level <sup>a</sup>              | 0 (ref.)                                              | 29.2         | (-18.7, 105.3)        | -32.1        | (-17.2, 110.6)        | 57.7         | (-4.8, 161.1)         |
| Awakening response <sup>b</sup>           | 0 (ref.)                                              | -29.1        | (-65.6, 46.1)         | -28.6        | (-65.4, 47.7)         | -32.0        | (-67.1, 41.0)         |
| Early decline <sup>c</sup>                | 0 (ref.)                                              | -0.3         | (-14.5, 16.3)         | -1.0         | (-15.1, 15.5)         | -0.4         | (-14.7, 16.3)         |
| Late decline <sup>d</sup>                 | 0 (ref.)                                              | -0.8         | (-74.3, 178.1)        | -0.8         | (-5.6, 4.3)           | -0.8         | (-5.6, 4.3)           |
| Night rise <sup>e</sup>                   | 0 (ref.)                                              | -15.5        | (-35.4, 164.4)        | -15.3        | (-74.5, 181.7)        | -28.9        | (-78.3, 133.2)        |
| AUC <sup>f</sup>                          | 0 (ref.)                                              | -0.6         | (-5.2, 4.0)           | -0.5         | (-5.2, 4.3)           | 2.0          | (-3.3, 7.4)           |
| Overall slope <sup>g</sup>                | 0 (ref.)                                              | -1.6         | (-4.6, 1.5)           | -1.7         | (-4.7, 1.5)           | -1.8         | (-4.7, 1.3)           |
| Overall slope without peak <sup>h</sup>   | 0 (ref.)                                              | -2.1         | (-5.6, 1.4)           | -2.0         | (-5.4, 1.6)           | -2.1         | (-5.5, 1.4)           |
| <b>Not definite morning types (n=225)</b> | N=76                                                  | N=132        |                       | N=132        |                       | N=132        |                       |
| Awakening level <sup>a</sup>              | 0 (ref.)                                              | 11.8         | (-21.4, 59.1)         | 13.6         | (-20.2, 61.7)         | 8.0          | (-24.3, 54.3)         |
| Awakening response <sup>b</sup>           | 0 (ref.)                                              | -30.3        | (-59.2, 19.0)         | -32.6        | (-60.5, 15.0)         | -32.6        | (-60.5, 15.1)         |
| Early decline <sup>c</sup>                | 0 (ref.)                                              | 3.5          | (-7.3, 15.7)          | 4.4          | (-6.5, 16.7)          | 4.4          | (-6.6, 16.6)          |
| Late decline <sup>d</sup>                 | 0 (ref.)                                              | 0.7          | (-2.8, 4.2)           | 0.5          | (-2.9, 4.1)           | 0.6          | (-2.9, 4.1)           |
| Night rise <sup>e</sup>                   | 0 (ref.)                                              | <b>-45.6</b> | <b>(-63.9, -17.8)</b> | <b>-47.5</b> | <b>(-65.4, -20.6)</b> | <b>-46.5</b> | <b>(-64.7, -19.1)</b> |
| AUC <sup>f</sup>                          | 0 (ref.)                                              | -0.4         | (-3.6, 2.8)           | -0.3         | (-3.6, 2.9)           | -1.1         | (-4.4, 2.2)           |
| Overall slope <sup>g</sup>                | 0 (ref.)                                              | -0.7         | (-2.7, 1.4)           | -0.7         | (-2.7, 1.4)           | -0.6         | (-2.6, 1.5)           |
| Overall slope without peak <sup>h</sup>   | 0 (ref.)                                              | -1.1         | (-3.5, 1.5)           | -1.3         | (-3.8, 1.3)           | -1.2         | (-3.7, 1.3)           |

Abbreviations: %D, Percent Differences; CI, confidence interval; AUC, area under curve;

<sup>a</sup> Amylase level at awakening<sup>b</sup> Change from awakening to 45 minutes after awakening<sup>c</sup> Change from 45 minutes after awakening to 4 hours after awakening<sup>d</sup> Change from 4 hours after awakening to 16 hours after awakening<sup>e</sup> Change from 16 hours after awakening to bedtime<sup>f</sup> Area under the curve, levels from wake up time to 16 hours after awakening<sup>g</sup> Change from wakening to bedtime<sup>h</sup> Change from wakening to bedtime without morning peak (at 45 minutes)

\* Adjusted for age at sample collection, wake-up sample within 15 min of waking up (yes/no), saliva collection characteristics (brushed, ate, drank, exercised, happy, worried), usual hours of sleep, last night's hours of sleep, trauma score in last month (0,1, 2+ events), belonging to sexual orientation minority (yes/no); birth control (yes/no, in females only)

\*\* Additionally adjusted for maternal characteristics: maternal age at birth, BMI before pregnancy, smoking status before pregnancy (smoker, past smoker, never smoker), alternative healthy eating score (quintiles), physical activity (MET-hours/week; quintiles), husband's education (less than 2yr college, 4yr college, grad school), maternal lifetime history of depression diagnosis (yes/no)

Supplemental Table 3. Geometric means and geometric standard deviation factors of outlier- and batch corrected **observed cortisol values** at each of the 5 measurement points obtained from GUTS 2 participants born to mothers who never worked night shifts before pregnancy and those whose mothers had worked night shifts before pregnancy.

| Participants                        | Maternal history of night shift work before pregnancy |                     |                |                     |
|-------------------------------------|-------------------------------------------------------|---------------------|----------------|---------------------|
|                                     | Never                                                 |                     | Ever           |                     |
|                                     | N=112                                                 |                     | N=208          |                     |
|                                     | Geometric mean                                        | Geometric SD factor | Geometric mean | Geometric SD factor |
| <b>Overall</b>                      |                                                       |                     |                |                     |
| Awakening level <sup>a</sup>        | 16.5                                                  | 0.7                 | 18.0           | 0.5                 |
| 45 min after awakening <sup>b</sup> | 19.4                                                  | 0.8                 | 20.6           | 0.7                 |
| 4h after awakening <sup>c</sup>     | 7.5                                                   | 0.4                 | 7.3            | 0.3                 |
| 10h after awakening <sup>d</sup>    | 4.1                                                   | 0.2                 | 4.9            | 0.2                 |
| Bed time <sup>e</sup>               | 2.1                                                   | 0.1                 | 2.4            | 0.1                 |
| <b>Females</b>                      | N=73                                                  |                     | N=161          |                     |
| Awakening level <sup>a</sup>        | 17.8                                                  | 1.0                 | 17.5           | 0.6                 |
| 45 min after awakening <sup>b</sup> | 21.9                                                  | 1.1                 | 21.1           | 0.7                 |
| 4h after awakening <sup>c</sup>     | 7.2                                                   | 0.5                 | 7.6            | 0.3                 |
| 10h after awakening <sup>d</sup>    | 4.2                                                   | 0.3                 | 5.0            | 0.2                 |
| Bed time <sup>e</sup>               | 2.3                                                   | 0.2                 | 2.6            | 0.1                 |
| <b>Males</b>                        | N=39                                                  |                     | N=47           |                     |
| Awakening level <sup>a</sup>        | 14.5                                                  | 1.1                 | 19.5           | 1.3                 |
| 45 min after awakening <sup>b</sup> | 15.6                                                  | 1.1                 | 19.3           | 1.4                 |
| 4h after awakening <sup>c</sup>     | 8.0                                                   | 0.6                 | 6.4            | 0.5                 |
| 10h after awakening <sup>d</sup>    | 4.0                                                   | 0.4                 | 4.7            | 0.5                 |
| Bed time <sup>e</sup>               | 1.9                                                   | 0.2                 | 2.1            | 0.2                 |

<sup>a</sup> Cortisol level at awakening<sup>b</sup> Cortisol level at 45 minutes after awakening<sup>c</sup> Cortisol level at 4 hours after awakening<sup>d</sup> Cortisol level at 10 hours after awakening<sup>e</sup> Cortisol level at bed time

Supplemental Table 4. Geometric means and geometric standard deviation factors of outlier- and batch corrected **observed salivary alpha amylase values** at each of the 5 measurement points obtained from GUTS 2 participants born to mothers who never worked night shifts before pregnancy and those whose mothers had worked night shifts before pregnancy.

| Participants                        | Maternal history of night shift work before pregnancy |                     |                |                     |
|-------------------------------------|-------------------------------------------------------|---------------------|----------------|---------------------|
|                                     | Never<br>N=112                                        |                     | Ever<br>N=208  |                     |
|                                     | Geometric mean                                        | Geometric SD factor | Geometric mean | Geometric SD factor |
| <b>Overall</b>                      |                                                       |                     |                |                     |
| Awakening level <sup>a</sup>        | 37.0                                                  | 5.6                 | 44.7           | 4.4                 |
| 45 min after awakening <sup>b</sup> | 26.0                                                  | 2.5                 | 23.7           | 2.0                 |
| 4h after awakening <sup>c</sup>     | 58.9                                                  | 4.7                 | 58.9           | 3.0                 |
| 10h after awakening <sup>d</sup>    | 70.9                                                  | 4.5                 | 63.3           | 3.9                 |
| Bed time <sup>e</sup>               | 48.0                                                  | 4.0                 | 45.2           | 3.1                 |
|                                     |                                                       |                     |                |                     |
| <b>Females</b>                      | N=73                                                  |                     | N=161          |                     |
| Awakening level <sup>a</sup>        | 43.3                                                  | 7.7                 | 45.8           | 5.3                 |
| 45 min after awakening <sup>b</sup> | 24.6                                                  | 3.1                 | 23.9           | 2.3                 |
| 4h after awakening <sup>c</sup>     | 59.2                                                  | 6.4                 | 56.2           | 3.2                 |
| 10h after awakening <sup>d</sup>    | 74.3                                                  | 5.6                 | 63.1           | 4.0                 |
| Bed time <sup>e</sup>               | 53.3                                                  | 5.6                 | 47.0           | 3.6                 |
|                                     |                                                       |                     |                |                     |
| <b>Males</b>                        | N=39                                                  |                     | N=47           |                     |
| Awakening level <sup>a</sup>        | 27.4                                                  | 7.5                 | 40.8           | 7.4                 |
| 45 min after awakening <sup>b</sup> | 28.8                                                  | 4.1                 | 22.7           | 4.2                 |
| 4h after awakening <sup>c</sup>     | 58.3                                                  | 6.7                 | 69.9           | 7.1                 |
| 10h after awakening <sup>d</sup>    | 65.0                                                  | 7.6                 | 63.8           | 10.3                |
| Bed time <sup>e</sup>               | 42.5                                                  | 5.6                 | 39.6           | 5.6                 |

<sup>a</sup> Amylase level at awakening<sup>b</sup> Amylase level at 45 minutes after awakening<sup>c</sup> Amylase level at 4 hours after awakening<sup>d</sup> Amylase level at 10 hours after awakening<sup>e</sup> Amylase level at bedtime

### Timeline of exposure and outcome assessment

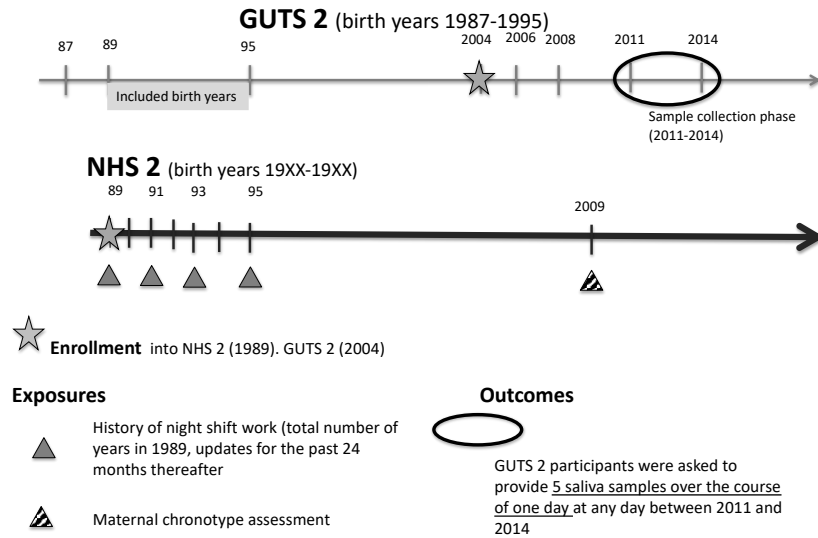

Supplemental Figure 1: Time line of exposure and outcome assessments
